# Supplementary material for: Exploring microfluidics-based organoid interactions through analysis of albumin secretion
Source: Royal Society of Chemistry journal article supplement (doi:10.1039/d4lc01085j), 2025-01-01
Supplement: d4lc01085j1.xlsx [file d4lc01085j1.xlsx]

## Sheet: Figure 2B and 2C
	blank	control	1	1,reverse	2	2,reverse	3	3,reverse	4	4,reverse	5	5,reverse	6	6,reverse	7	7,reverse
OD（n=3）	0.134	0.192	0.277	0.327	0.31	0.347	0.377	0.318	0.301	0.328	0.302	0.272	0.286	0.288	0.253	0.279
	0.132	0.197	0.273	0.329	0.295	0.348	0.382	0.33	0.325	0.314	0.314	0.268	0.276	0.283	0.266	0.261
	0.133	0.193	0.27	0.324	0.306	0.335	0.395	0.339	0.313	0.319	0.309	0.257	0.29	0.274	0.246	0.27
control-blank(n=3）		0.058	0.143	0.193	0.176	0.213	0.243	0.184	0.167	0.194	0.168	0.138	0.152	0.154	0.119	0.145
		0.065	0.141	0.197	0.163	0.216	0.25	0.198	0.193	0.182	0.182	0.136	0.144	0.151	0.134	0.129
		0.06	0.137	0.191	0.173	0.202	0.262	0.206	0.18	0.186	0.176	0.124	0.157	0.141	0.113	0.137
	albumin（g/L）=(control-blank)/0.1778
albumin (g/L）（n=3）		0.326209	0.804274	1.08549	0.989876	1.19798	1.3667	1.03487	0.939258	1.09111	0.944882	0.776153	0.854893	0.866142	0.669291	0.815523
		0.365579	0.793026	1.10799	0.91676	1.21485	1.40607	1.11361	1.08549	1.02362	1.02362	0.764904	0.809899	0.849269	0.753656	0.725534
		0.337458	0.770529	1.07424	0.973003	1.13611	1.47357	1.15861	1.01237	1.04612	0.989876	0.697413	0.883015	0.793026	0.635546	0.770529

## Sheet: Figure 2D
	blank	control	8	9	10	11	12	13	14	15	16	17	18
OD（n=3）	0.104	0.233	0.223	0.231	0.242	0.238	0.229	0.218	0.233	0.252	0.274	0.285	0.297
	0.102	0.224	0.221	0.242	0.221	0.242	0.237	0.229	0.227	0.257	0.267	0.28	0.302
	0.109	0.231	0.23	0.237	0.225	0.232	0.237	0.224	0.224	0.26	0.272	0.276	0.294
control-blank(n=3）		0.129	0.119	0.127	0.138	0.134	0.125	0.114	0.129	0.148	0.17	0.181	0.193
		0.122	0.119	0.14	0.119	0.14	0.135	0.127	0.125	0.155	0.165	0.178	0.2
		0.122	0.121	0.128	0.116	0.123	0.128	0.115	0.115	0.151	0.163	0.167	0.185
	albumin（g/L）=(control-blank)/0.1778
albumin (g/L）（n=3）		0.756468	0.700225	0.745219	0.807087	0.784589	0.733971	0.672103	0.756468	0.86333	0.987064	1.04893	1.11642
		0.717098	0.700225	0.818335	0.700225	0.818335	0.790214	0.745219	0.733971	0.9027	0.958943	1.03206	1.15579
		0.717098	0.711474	0.750844	0.683352	0.722722	0.750844	0.677728	0.677728	0.880202	0.947694	0.970191	1.07143

## Sheet: Figure 3B
	blank	control	19	20	21	22	23
OD（n=3）	0.142	0.223	0.355	0.384	0.378	0.361	0.352
	0.145	0.227	0.367	0.392	0.385	0.351	0.357
	0.148	0.205	0.361	0.38	0.383	0.372	0.351
control-blank(n=3）		0.081	0.213	0.242	0.236	0.219	0.21
		0.082	0.222	0.247	0.24	0.206	0.212
		0.057	0.213	0.232	0.235	0.224	0.203
	albumin（g/L）=(control-blank)/0.1778
albumin (g/L）（n=3）		0.455568	1.19798	1.36108	1.32733	1.23172	1.1811
		0.461192	1.24859	1.3892	1.34983	1.15861	1.19235
		0.320585	1.19798	1.30484	1.32171	1.25984	1.14173

## Sheet: Figure 3C
	blank	Con	Ⅰ	Ⅱ	Ⅲ	Ⅳ	Ⅴ
OD（n=3）	0.125	0.258	0.32	0.33	0.319	0.329	0.323
	0.122	0.249	0.327	0.324	0.31	0.336	0.317
	0.122	0.243	0.315	0.327	0.324	0.333	0.314
control-blank(n=3）		0.133	0.195	0.205	0.194	0.204	0.198
		0.127	0.205	0.202	0.188	0.214	0.195
		0.121	0.193	0.205	0.202	0.211	0.192
	albumin（g/L）=(control-blank)/0.1778
albumin (g/L）（n=3）		0.748031	1.09674	1.15298	1.09111	1.14736	1.11361
		0.714286	1.15298	1.13611	1.05737	1.2036	1.09674
		0.68054	1.08549	1.15298	1.13611	1.18673	1.07987

## Sheet: Figure 3D
	blank	Ⅰ	Ⅱ	Ⅲ	Ⅳ	Ⅴ	Ⅵ
OD（n=3）	0.118	0.123	0.183	0.279	0.282	0.322	0.345
	0.12	0.124	0.186	0.302	0.298	0.306	0.352
	0.117	0.119	0.192	0.271	0.279	0.313	0.373
control-blank(n=3）		0.005	0.065	0.161	0.164	0.204	0.227
		0.004	0.066	0.182	0.178	0.186	0.232
		0.002	0.075	0.154	0.162	0.196	0.256
	albumin（g/L）=(control-blank)/0.1778
albumin (g/L）（n=3）		0.0281215	0.365579	0.905512	0.922385	1.14736	1.27672
		0.0224972	0.371204	1.02362	1.00112	1.04612	1.30484
		0.0112486	0.421822	0.866142	0.911136	1.10236	1.43982

## Sheet: Figure 3E
		1	2	3	4	5	6	7	8	9	10	11	12
	A	0.053	0.045	0.044	0.045	0.044	0.046	0.046	0.045	0.044	0.046	0.047	0.046	630
	B	0.047	0.115	0.232	0.257	0.235	0.321	0.257	0.299	0.186	0.224	0.048	0.046	630
	C	0.047	0.117	0.23	0.268	0.228	0.328	0.253	0.292	0.182	0.227	0.048	0.046	630
	D	0.048	0.117	0.233	0.249	0.232	0.319	0.259	0.294	0.183	0.229	0.047	0.047	630
	E	0.046	0.046	0.047	0.047	0.046	0.045	0.044	0.047	0.045	0.046	0.047	0.049	630
	F	0.047	0.046	0.047	0.047	0.046	0.046	0.046	0.046	0.045	0.046	0.047	0.046	630
	G	0.044	0.046	0.044	0.044	0.046	0.046	0.046	0.047	0.047	0.046	0.046	0.045	630
	H	0.045	0.044	0.052	0.045	0.044	0.046	0.046	0.045	0.045	0.045	0.046	0.046	630
			blank	4ml liver alone	4ml co-culture	8ml liver alone	8ml co-culture	16ml liver alone	16ml co-culture	32ml liver alone	32ml co-culture
		Absolute OD	0.115	0.232	0.257	0.235	0.321	0.257	0.299	0.186	0.224
			0.117	0.23	0.268	0.228	0.328	0.253	0.292	0.182	0.227
			0.117	0.233	0.249	0.232	0.319	0.259	0.294	0.183	0.229
		relative OD		0.117	0.142	0.12	0.206	0.142	0.184	0.071	0.109
				0.113	0.151	0.111	0.211	0.136	0.175	0.065	0.11
				0.116	0.132	0.115	0.202	0.142	0.177	0.066	0.112
		concentration（g/L）		0.658043	0.79865	0.674916	1.15861	0.79865	1.03487	0.399325	0.613048
				0.635546	0.849269	0.624297	1.18673	0.764904	0.984252	0.365579	0.618673
				0.652418	0.742407	0.646794	1.13611	0.79865	0.995501	0.371204	0.629921
		mass (mg)		2.63217	3.1946	5.39933	9.26884	12.7784	16.5579	12.7784	19.6175
				2.54218	3.39708	4.99438	9.49381	12.2385	15.748	11.6985	19.7975
				2.60967	2.96963	5.17435	9.08886	12.7784	15.928	11.8785	20.1575

## Sheet: Figure 3F
			day		1	2	3	4	5	6	7	8	9	10
				15ul/min	0.231	0.289	0.328	0.349	0.381	0.39	0.39	0.414	0.421	0.422
					0.234	0.282	0.321	0.356	0.379	0.395	0.404	0.415	0.425	0.42
					0.242	0.287	0.33	0.351	0.384	0.389	0.409	0.413	0.42	0.43
				absorbence	0.111	0.169	0.208	0.229	0.261	0.27	0.27	0.294	0.301	0.302
					0.11	0.158	0.197	0.232	0.255	0.271	0.28	0.291	0.301	0.296
					0.119	0.164	0.207	0.228	0.261	0.266	0.286	0.29	0.297	0.307
				concentration	0.624297	0.950506	1.16985	1.28796	1.46794	1.51856	1.51856	1.65354	1.69291	1.69854
					0.618673	0.888639	1.10799	1.30484	1.4342	1.52418	1.5748	1.63667	1.69291	1.66479
					0.669291	0.922385	1.16423	1.28234	1.46794	1.49606	1.60855	1.63105	1.67042	1.72666
				30ul/min	0.234	0.296	0.332	0.376	0.403	0.412	0.424	0.432	0.437	0.431
					0.237	0.295	0.334	0.378	0.393	0.409	0.418	0.43	0.429	0.439
					0.228	0.288	0.342	0.372	0.401	0.416	0.424	0.428	0.431	0.432
				absorbence	0.114	0.176	0.212	0.256	0.283	0.292	0.304	0.312	0.317	0.311
					0.113	0.171	0.21	0.254	0.269	0.285	0.294	0.306	0.305	0.315
					0.105	0.165	0.219	0.249	0.278	0.293	0.301	0.305	0.308	0.309
				concentration	0.64117	0.989876	1.19235	1.43982	1.59168	1.64229	1.70979	1.75478	1.7829	1.74916
					0.635546	0.961755	1.1811	1.42857	1.51294	1.60292	1.65354	1.72103	1.71541	1.77165
					0.590551	0.928009	1.23172	1.40045	1.56355	1.64792	1.69291	1.71541	1.73228	1.73791
				60ul/min	0.234	0.32	0.376	0.432	0.46	0.474	0.492	0.498	0.494	0.496
					0.248	0.328	0.381	0.435	0.453	0.484	0.495	0.5	0.493	0.499
					0.249	0.327	0.38	0.427	0.447	0.478	0.496	0.496	0.497	0.502
				absorbence	0.114	0.2	0.256	0.312	0.34	0.354	0.372	0.378	0.374	0.376
					0.124	0.204	0.257	0.311	0.329	0.36	0.371	0.376	0.369	0.375
					0.126	0.204	0.257	0.304	0.324	0.355	0.373	0.373	0.374	0.379
				concentration	0.64117	1.12486	1.43982	1.75478	1.91226	1.991	2.09224	2.12598	2.10349	2.11474
					0.697413	1.14736	1.44544	1.74916	1.85039	2.02475	2.08661	2.11474	2.07537	2.10911
					0.708661	1.14736	1.44544	1.70979	1.82227	1.99663	2.09786	2.09786	2.10349	2.13161

## Sheet: Figure 4A,B-sequence 3 D1
Size (nm) - events	Concentration (/mL) - events
30.25	0
30.75	0
31.25	0
31.75	0
32.25	0
32.75	0
33.25	0
33.75	0
34.25	0
34.75	0
35.25	0
35.75	0
36.25	0
36.75	0
37.25	0
37.75	0
38.25	0
38.75	0
39.25	0
39.75	0
40.25	0
40.75	0
41.25	0
41.75	0
42.25	0
42.75	0
43.25	0
43.75	0
44.25	0
44.75	0
45.25	0
45.75	0
46.25	0
46.75	0
47.25	0
47.75	0
48.25	0
48.75	0
49.25	0
49.75	0
50.25	0
50.75	0
51.25	0
51.75	0
52.25	0
52.75	0
53.25	0
53.75	0
54.25	479000
54.75	0
55.25	0
55.75	0
56.25	957000
56.75	1440000
57.25	479000
57.75	479000
58.25	1910000
58.75	4310000
59.25	1910000
59.75	4310000
60.25	4310000
60.75	957000
61.25	5270000
61.75	7660000
62.25	7660000
62.75	3830000
63.25	7180000
63.75	4790000
64.25	8140000
64.75	10100000
65.25	9570000
65.75	5270000
66.25	7660000
66.75	16800000
67.25	9570000
67.75	13900000
68.25	27300000
68.75	29200000
69.25	32100000
69.75	38300000
70.25	35400000
70.75	36900000
71.25	46400000
71.75	45500000
72.25	39200000
72.75	43100000
73.25	42600000
73.75	40200000
74.25	45000000
74.75	37800000
75.25	32500000
75.75	40700000
76.25	38800000
76.75	32100000
77.25	43600000
77.75	38300000
78.25	33000000
78.75	40200000
79.25	31600000
79.75	42100000
80.25	37800000
80.75	23900000
81.25	36900000
81.75	32100000
82.25	36400000
82.75	30200000
83.25	29700000
83.75	31600000
84.25	32100000
84.75	25400000
85.25	26300000
85.75	20600000
86.25	19100000
86.75	30200000
87.25	33000000
87.75	20600000
88.25	24400000
88.75	22000000
89.25	23900000
89.75	22000000
90.25	18200000
90.75	21500000
91.25	16800000
91.75	22000000
92.25	21100000
92.75	14800000
93.25	19600000
93.75	19100000
94.25	19600000
94.75	16800000
95.25	12000000
95.75	19100000
96.25	22000000
96.75	13400000
97.25	14800000
97.75	13900000
98.25	10100000
98.75	14400000
99.25	8140000
99.75	14400000
100.25	11500000
100.75	17700000
101.25	12900000
101.75	8620000
102.25	12900000
102.75	7180000
103.25	11000000
103.75	15300000
104.25	14400000
104.75	11500000
105.25	11500000
105.75	9090000
106.25	10100000
106.75	9570000
107.25	7180000
107.75	8620000
108.25	10100000
108.75	6700000
109.25	7180000
109.75	12000000
110.25	7660000
110.75	11000000
111.25	11500000
111.75	6220000
112.25	9090000
112.75	5740000
113.25	6700000
113.75	7180000
114.25	5740000
114.75	8620000
115.25	6220000
115.75	5740000
116.25	5740000
116.75	12900000
117.25	9570000
117.75	8140000
118.25	6220000
118.75	4790000
119.25	5740000
119.75	6700000
120.25	5740000
120.75	3830000
121.25	9090000
121.75	4310000
122.25	4790000
122.75	6700000
123.25	2870000
123.75	6700000
124.25	3830000
124.75	4310000
125.25	6220000
125.75	3830000
126.25	5270000
126.75	6700000
127.25	4310000
127.75	6700000
128.25	5270000
128.75	957000
129.25	4310000
129.75	7180000
130.25	3350000
130.75	3830000
131.25	4310000
131.75	2390000
132.25	5740000
132.75	5740000
133.25	3350000
133.75	5740000
134.25	3350000
134.75	3350000
135.25	5270000
135.75	2390000
136.25	1440000
136.75	1910000
137.25	3350000
137.75	1440000
138.25	2870000
138.75	3350000
139.25	2390000
139.75	5270000
140.25	3350000
140.75	5270000
141.25	2390000
141.75	2870000
142.25	3830000
142.75	4310000
143.25	3830000
143.75	2870000
144.25	2870000
144.75	479000
145.25	957000
145.75	3350000
146.25	1910000
146.75	2870000
147.25	2390000
147.75	2870000
148.25	2390000
148.75	2870000
149.25	1910000
149.75	2390000

## Sheet: Figure 4A,B-sequence 3 D2
Size (nm) - events	Concentration (/mL) - events
30.25	0
30.75	0
31.25	0
31.75	0
32.25	0
32.75	0
33.25	0
33.75	0
34.25	0
34.75	0
35.25	0
35.75	0
36.25	0
36.75	0
37.25	0
37.75	0
38.25	0
38.75	0
39.25	0
39.75	0
40.25	0
40.75	0
41.25	0
41.75	0
42.25	0
42.75	0
43.25	0
43.75	0
44.25	0
44.75	0
45.25	0
45.75	0
46.25	0
46.75	0
47.25	0
47.75	0
48.25	0
48.75	0
49.25	0
49.75	0
50.25	0
50.75	0
51.25	0
51.75	0
52.25	0
52.75	0
53.25	0
53.75	0
54.25	1440000
54.75	0
55.25	2870000
55.75	0
56.25	2870000
56.75	4310000
57.25	0
57.75	4310000
58.25	1440000
58.75	0
59.25	2870000
59.75	5740000
60.25	10100000
60.75	5740000
61.25	1440000
61.75	2870000
62.25	18700000
62.75	18700000
63.25	8620000
63.75	14400000
64.25	23000000
64.75	10100000
65.25	14400000
65.75	10100000
66.25	15800000
66.75	15800000
67.25	18700000
67.75	4310000
68.25	44500000
68.75	48800000
69.25	37300000
69.75	50300000
70.25	44500000
70.75	33000000
71.25	63200000
71.75	47400000
72.25	41600000
72.75	56000000
73.25	56000000
73.75	41600000
74.25	60300000
74.75	56000000
75.25	58900000
75.75	64600000
76.25	44500000
76.75	44500000
77.25	38800000
77.75	41600000
78.25	54600000
78.75	47400000
79.25	58900000
79.75	66100000
80.25	60300000
80.75	35900000
81.25	54600000
81.75	43100000
82.25	46000000
82.75	34500000
83.25	44500000
83.75	50300000
84.25	43100000
84.75	44500000
85.25	43100000
85.75	33000000
86.25	35900000
86.75	44500000
87.25	28700000
87.75	33000000
88.25	31600000
88.75	27300000
89.25	40200000
89.75	30200000
90.25	35900000
90.75	34500000
91.25	28700000
91.75	33000000
92.25	28700000
92.75	33000000
93.25	30200000
93.75	35900000
94.25	25800000
94.75	40200000
95.25	44500000
95.75	28700000
96.25	37300000
96.75	24400000
97.25	24400000
97.75	34500000
98.25	31600000
98.75	28700000
99.25	18700000
99.75	27300000
100.25	17200000
100.75	18700000
101.25	21500000
101.75	12900000
102.25	23000000
102.75	15800000
103.25	24400000
103.75	30200000
104.25	25800000
104.75	15800000
105.25	15800000
105.75	21500000
106.25	27300000
106.75	30200000
107.25	21500000
107.75	21500000
108.25	21500000
108.75	14400000
109.25	20100000
109.75	25800000
110.25	21500000
110.75	17200000
111.25	23000000
111.75	20100000
112.25	17200000
112.75	10100000
113.25	11500000
113.75	11500000
114.25	11500000
114.75	18700000
115.25	14400000
115.75	20100000
116.25	11500000
116.75	2870000
117.25	17200000
117.75	14400000
118.25	7180000
118.75	14400000
119.25	12900000
119.75	7180000
120.25	8620000
120.75	15800000
121.25	15800000
121.75	7180000
122.25	15800000
122.75	12900000
123.25	4310000
123.75	10100000
124.25	11500000
124.75	8620000
125.25	10100000
125.75	11500000
126.25	5740000
126.75	5740000
127.25	5740000
127.75	7180000
128.25	7180000
128.75	7180000
129.25	11500000
129.75	11500000
130.25	12900000
130.75	5740000
131.25	8620000
131.75	17200000
132.25	2870000
132.75	7180000
133.25	2870000
133.75	5740000
134.25	7180000
134.75	5740000
135.25	8620000
135.75	5740000
136.25	4310000
136.75	8620000
137.25	1440000
137.75	4310000
138.25	4310000
138.75	4310000
139.25	7180000
139.75	5740000
140.25	5740000
140.75	7180000
141.25	1440000
141.75	10100000
142.25	5740000
142.75	7180000
143.25	10100000
143.75	2870000
144.25	2870000
144.75	1440000
145.25	5740000
145.75	0
146.25	0
146.75	0
147.25	1440000
147.75	1440000
148.25	2870000
148.75	1440000
149.25	1440000
149.75	8620000

## Sheet: Figure 4A,B-sequence 3 D3
Size (nm) - events	Concentration (/mL) - events
30.25	0
30.75	0
31.25	0
31.75	0
32.25	0
32.75	0
33.25	0
33.75	0
34.25	0
34.75	0
35.25	0
35.75	0
36.25	0
36.75	0
37.25	0
37.75	0
38.25	0
38.75	0
39.25	0
39.75	0
40.25	0
40.75	0
41.25	0
41.75	0
42.25	0
42.75	0
43.25	0
43.75	0
44.25	0
44.75	0
45.25	0
45.75	0
46.25	0
46.75	0
47.25	0
47.75	0
48.25	0
48.75	0
49.25	0
49.75	0
50.25	0
50.75	0
51.25	0
51.75	0
52.25	0
52.75	0
53.25	1440000
53.75	0
54.25	1440000
54.75	1440000
55.25	1440000
55.75	4310000
56.25	0
56.75	2870000
57.25	8620000
57.75	2870000
58.25	4310000
58.75	5740000
59.25	7180000
59.75	2870000
60.25	0
60.75	8620000
61.25	1440000
61.75	14400000
62.25	10100000
62.75	15800000
63.25	15800000
63.75	15800000
64.25	17200000
64.75	21500000
65.25	27300000
65.75	11500000
66.25	21500000
66.75	20100000
67.25	27300000
67.75	23000000
68.25	68900000
68.75	35900000
69.25	76100000
69.75	51700000
70.25	64600000
70.75	58900000
71.25	76100000
71.75	71800000
72.25	41600000
72.75	73200000
73.25	57400000
73.75	73200000
74.25	80400000
74.75	73200000
75.25	43100000
75.75	87600000
76.25	41600000
76.75	68900000
77.25	66100000
77.75	67500000
78.25	61700000
78.75	83300000
79.25	54600000
79.75	76100000
80.25	43100000
80.75	57400000
81.25	67500000
81.75	57400000
82.25	60300000
82.75	48800000
83.25	50300000
83.75	64600000
84.25	53100000
84.75	46000000
85.25	33000000
85.75	47400000
86.25	58900000
86.75	33000000
87.25	44500000
87.75	46000000
88.25	35900000
88.75	34500000
89.25	43100000
89.75	38800000
90.25	31600000
90.75	37300000
91.25	38800000
91.75	41600000
92.25	37300000
92.75	37300000
93.25	27300000
93.75	31600000
94.25	30200000
94.75	27300000
95.25	24400000
95.75	31600000
96.25	33000000
96.75	34500000
97.25	30200000
97.75	35900000
98.25	27300000
98.75	12900000
99.25	31600000
99.75	27300000
100.25	37300000
100.75	51700000
101.25	35900000
101.75	28700000
102.25	18700000
102.75	31600000
103.25	34500000
103.75	27300000
104.25	25800000
104.75	35900000
105.25	21500000
105.75	21500000
106.25	40200000
106.75	20100000
107.25	25800000
107.75	27300000
108.25	18700000
108.75	21500000
109.25	18700000
109.75	28700000
110.25	21500000
110.75	20100000
111.25	11500000
111.75	23000000
112.25	12900000
112.75	14400000
113.25	24400000
113.75	12900000
114.25	15800000
114.75	12900000
115.25	25800000
115.75	20100000
116.25	17200000
116.75	23000000
117.25	15800000
117.75	14400000
118.25	14400000
118.75	20100000
119.25	17200000
119.75	7180000
120.25	18700000
120.75	14400000
121.25	7180000
121.75	14400000
122.25	12900000
122.75	14400000
123.25	20100000
123.75	10100000
124.25	14400000
124.75	5740000
125.25	10100000
125.75	12900000
126.25	10100000
126.75	8620000
127.25	8620000
127.75	14400000
128.25	11500000
128.75	7180000
129.25	12900000
129.75	7180000
130.25	10100000
130.75	5740000
131.25	11500000
131.75	10100000
132.25	4310000
132.75	11500000
133.25	11500000
133.75	8620000
134.25	5740000
134.75	2870000
135.25	4310000
135.75	1440000
136.25	10100000
136.75	5740000
137.25	7180000
137.75	5740000
138.25	2870000
138.75	1440000
139.25	7180000
139.75	5740000
140.25	8620000
140.75	5740000
141.25	11500000
141.75	2870000
142.25	2870000
142.75	4310000
143.25	7180000
143.75	11500000
144.25	5740000
144.75	2870000
145.25	5740000
145.75	1440000
146.25	5740000
146.75	4310000
147.25	2870000
147.75	2870000
148.25	0
148.75	4310000
149.25	5740000
149.75	1440000

[truncated: 5 more sheets: Figure 4A,B-sequence 3 rev D1, Figure 4A,B-sequence 3 rev D2, Figure 4A,B-sequence 3 rev D3, Figure 4C, 4D and 4E, Figure 5B]
